# Supplementary material for: Visible-light-driven photocatalytic properties of binary MoS2/ZnS heterostructured nanojunctions synthesized via one-step hydrothermal route
Source: Royal Society of Chemistry journal article supplement (doi:10.1039/c6nj03727e), 2017-01-01
Supplement: c6nj03727e1.pdf [file c6nj03727e1.pdf]

## Visible Light Driven Photocatalytic Properties of Binary MoS<sub>2</sub>/ZnS Heterostructured Nanojunctions Synthesized Via One-Step Hydrothermal Route

Mega Joy<sup>a</sup>, A. Peer Mohamed<sup>a</sup>, K.G.K. Warriar<sup>a</sup> and U. S. Hareesh<sup>a\*</sup>

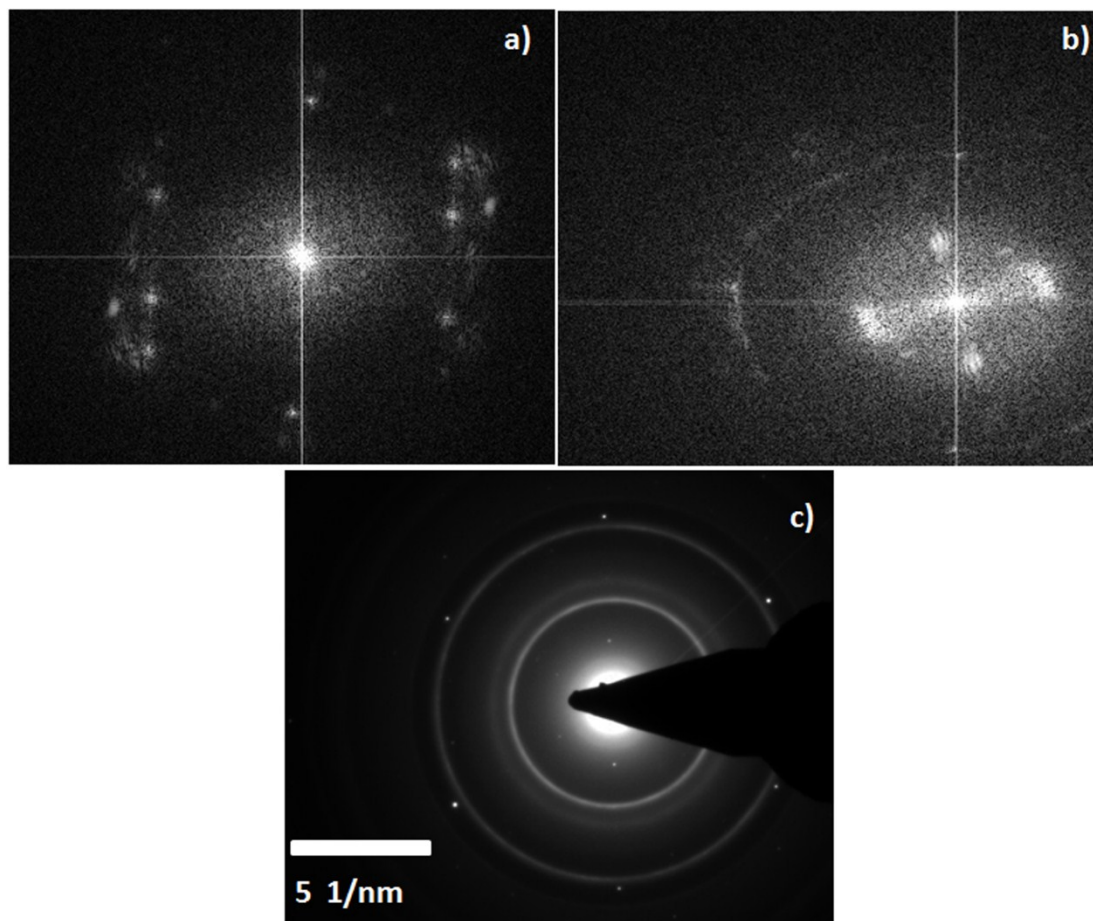

**Fig. S1** FTFT of a) ZnS, b) MoS<sub>2</sub> and c) SAED of MoS<sub>2</sub>/ZnS nanojunctions

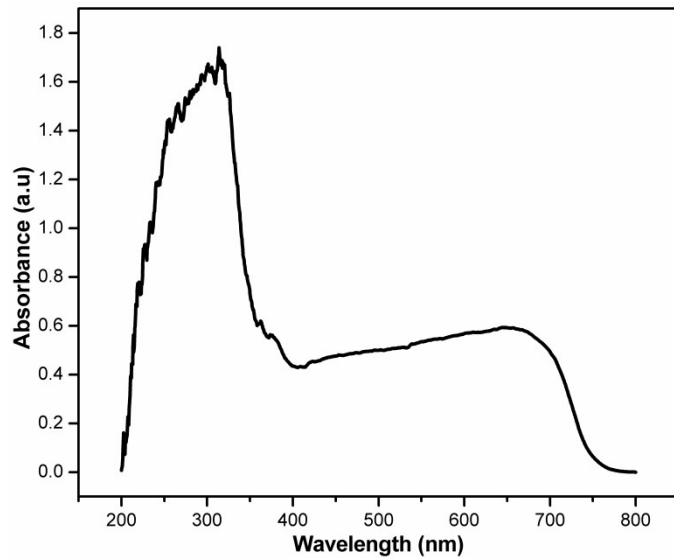

Fig. S2 DRS of MoS<sub>2</sub>

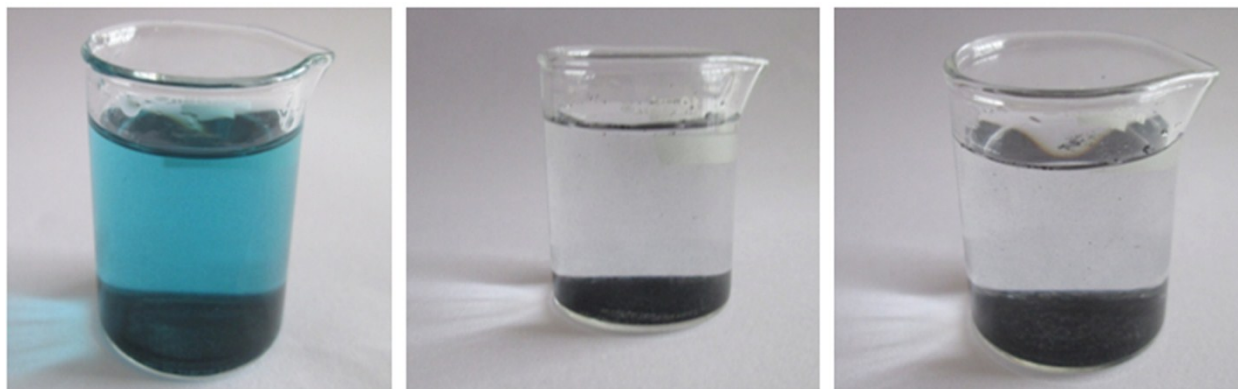

Fig. S3 a) photographs a) initial MG solution, b) completely degraded solution and c) residue obtained after the reaction desorbed with ethanol.

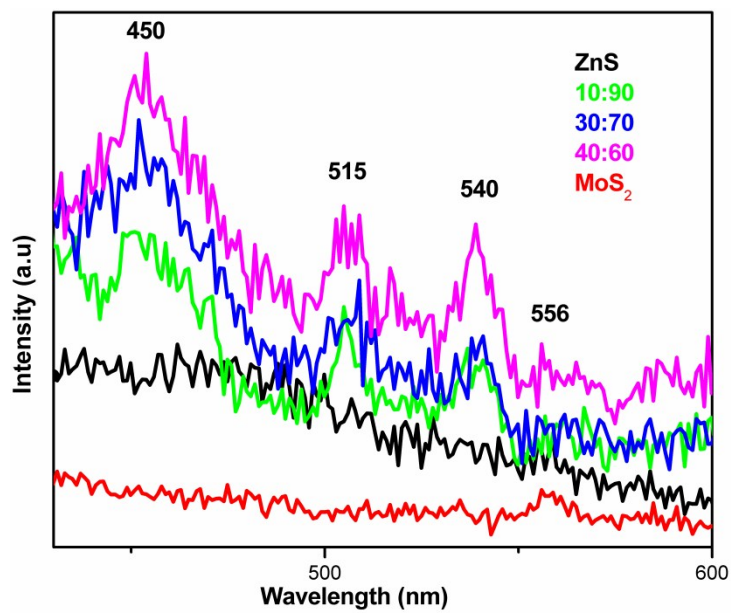

**Fig. S4** Mass normalized photoluminescence emission spectra of ZnS, MoS<sub>2</sub> and MoS<sub>2</sub>/ZnS heterostructures at room temperature.

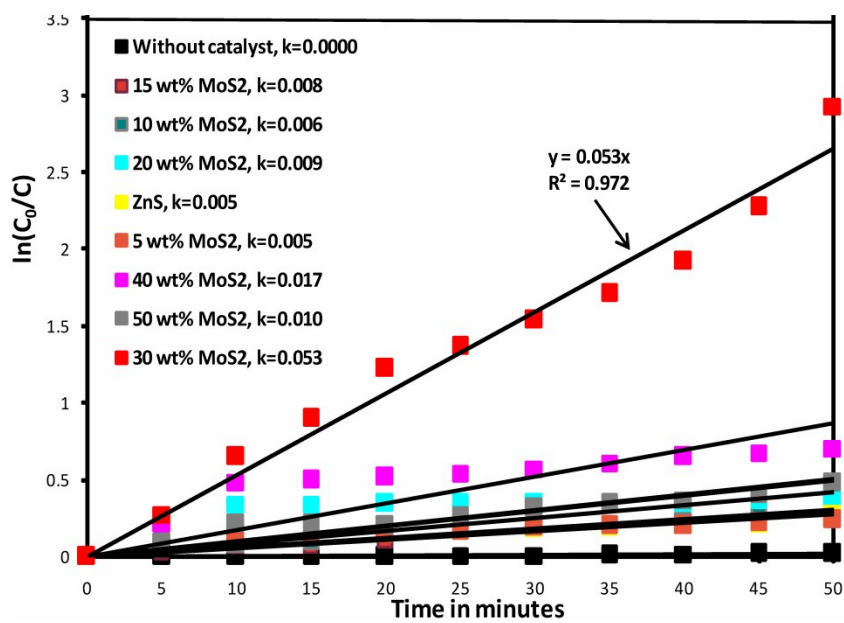

**Fig. S5** Rate of photocatalytic degradation of MG over the synthesized ZnS and MoS<sub>2</sub>/ZnS heterostructures.

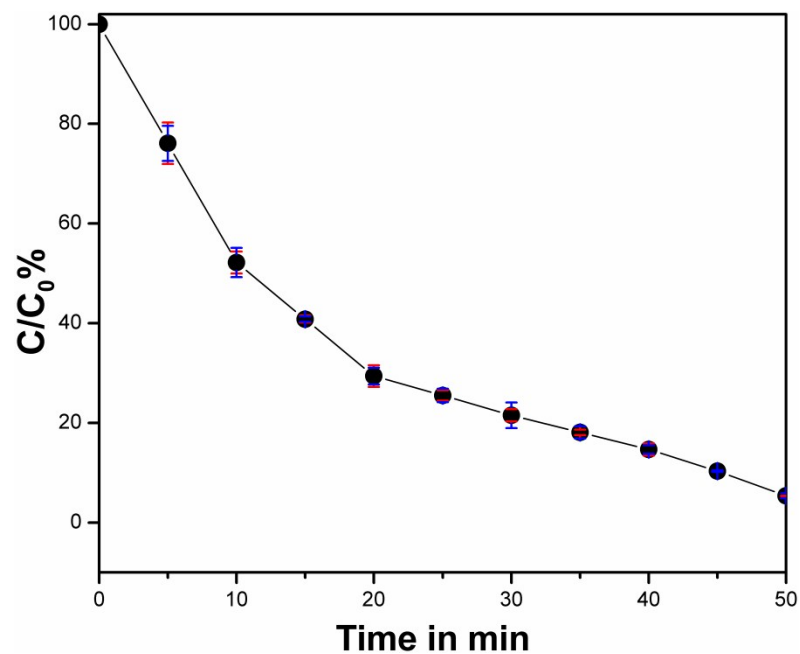

**Fig. S6** Repeated malachite green degradation kinetics with 30 –wt% MoS<sub>2</sub>/ZnS photocatalyst.

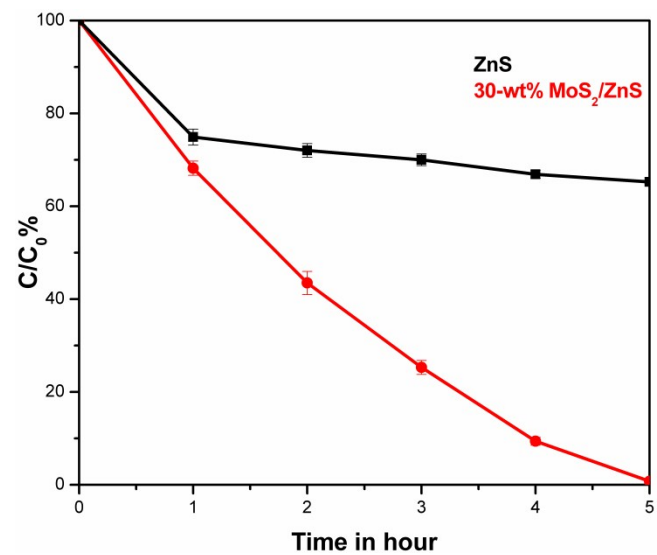

**Fig. S7** Photocatalytic degradation of para nitro phenol with ZnS and 30-wt% MoS<sub>2</sub>/ZnS.
